# Supplementary figures and images for: Whole-genome sequence assembly of Pediococcus pentosaceus LI05 (CGMCC 7049) from the human gastrointestinal tract and comparative analysis with representative sequences from three food-borne strains
Source: Springer Nature journal article supplement (doi:10.1186/s13099-014-0036-y), 2014-08-01

**Figure 4**

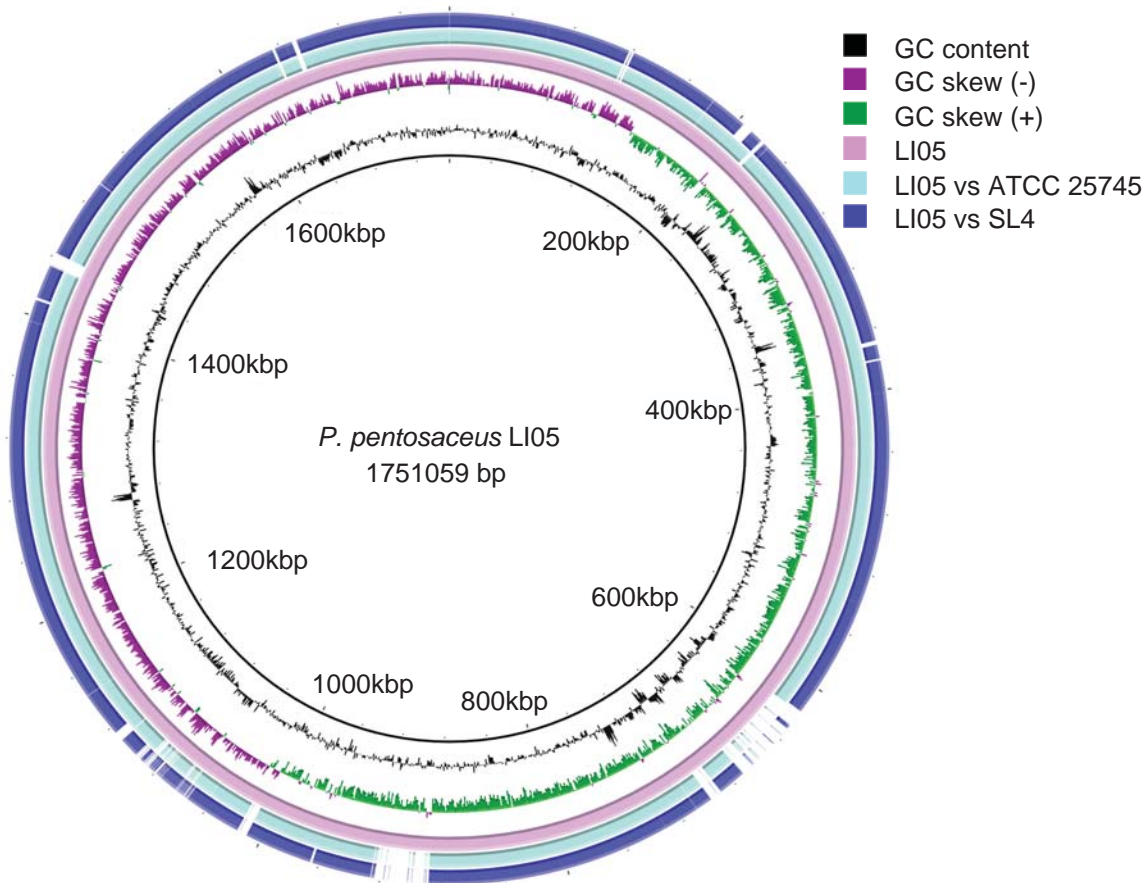

Supplement: MOESM6 [file 9784728]
